# Supplementary material for: The kinetic resolution of allylic alcohols by a non-enzymatic acylation catalyst; application to natural product synthesis
Source: Royal Society of Chemistry journal article supplement (doi:10.1039/b002041i), 2000-01-01
Supplement: b002041i.doc [file b002041i.doc]

The kinetic resolution of allylic alcohols by a non-enzymatic acylation catalyst; application to natural product synthesis

Stéphane Bellemin-Laponnaz, Jennifer Tweddell, J. Craig Ruble, Frank M. Breitling, and Gregory C. Fu*

Supporting Information

Department of Chemistry

Massachusetts Institute of Technology

Cambridge, MA 02139

I. General

Analytical thin layer chromatography was performed using EM Reagents 0.25 mm silica gel 60 plates, and visualization was accomplished with ethanolic phosphomolybdic acid. Flash chromatography was performed on TCI silica gel 60 (230-400 mesh).

Analytical chiral GC was performed on either a Chiraldex B-PH column (20 m x 0.25 mm) or a Chiraldex G-TA column (20 m x 0.25 mm). Analytical chiral HPLC was performed on either a Chiralcel OD column (25 x 0.46 cm) or a Regis *R,R*-WHELK-O column (25 x 0.46 cm). Optical rotations were measured in CHCl3 as solvent.

NEt3 (CaH2), *t*-amyl alcohol (CaH2), and Ac2O (quinoline) were distilled prior to use.

Catalyst **1** was prepared as previously reported.[[1]](#footnote-2) The enantiomers were separated using semi-preparative HPLC (Regis *R,R*-WHELK-O, 1.0 cm x 25 cm, CH2Cl2/hexanes/HNEt2 50:50:0.4, 2.5 mL/min). Enantiomer (+)-**1** (enantiomerically pure by analytical chiral HPLC) was collected from 6.7 minutes to 8.5 minutes, and enantiomer (-)-**1** (enantiomerically pure by analytical chiral HPLC) was collected from 9.4 minutes to 11.7 minutes.

All reactions were carried out under an atmosphere of nitrogen or argon in oven-dried glassware with magnetic stirring, unless otherwise specified.

II. Kinetic Resolution of Allylic Alcohols (Table 1)

**Equations used to calculate the selectivity factor:**

• (ee of starting material)/(ee of product) = (conversion)/(1-conversion)

• s = (ln[1-conversion(1+ee of product)])/(ln[1-conversion(1-ee of product)])

**(*E*)-2-Methyloct-4-en-3-ol (entry 1). General Procedure.** Catalyst (+)-**1** (6.6 mg, 0.010 mmol), (*E*)-2-methyloct-4-en-3-ol (71.1 mg, 0.500 mmol), *t*-amyl alcohol (1.0 mL), and NEt3 (31.3 L, 0.225 mmol) were added in turn to a vial. The vial was capped with a septum, removed from the glove box, and sonicated to help dissolve the catalyst. After all of the catalyst had dissolved, the purple solution was cooled in an ice bath, and Ac2O (42.5 L, 0.450 mmol) was added by syringe. After 7 days, additional NEt3 (31.3 L, 0.225 mmol) was added. After 28 days (total), the reaction was quenched by the addition of a large excess of methanol. The reaction mixture was passed though a short plug of silica gel to remove the catalyst (20%  100% EtOAc/hexanes, then 50% NEt3/EtOAc), and the acetate and the alcohol were then separated by flash chromatography (15% Et2O/hexanes); GC analysis revealed a 34.0% ee of acetate. The alcohol was converted into the acetate (DMAP, Ac2O, NEt3) and analyzed by GC, which showed an 89.0% ee of acetate. These ee values correspond to a selectivity factor (s) of 5.3 at 72.4% conversion.

A second run provided a 31.3% ee of acetate and a 92.3% ee of alcohol (s = 5.5 at 74.7% conversion).

**(*E*)-4-Phenylbut-3-en-2-ol (entry 2).** The general procedure was followed, using 3.3 mg (0.0050 mmol) of (+)-**1**, 74.0 mg (0.500 mmol) of alcohol, 52.2 L (0.375 mmol) of NEt3, and 35.4 L (0.375 mmol) of Ac2O. Reaction time: 15.0 hours. GC analysis revealed an 82.7% ee of acetate. The alcohol was converted into the acetate (DMAP, Ac2O, NEt3) and analyzed by GC, which showed a 99.7% ee. These ee values correspond to a selectivity factor (s) of 65.2 at 54.6% conversion.

A second run provided an 85.8% ee of acetate and a 98.6% ee of alcohol (s = 63.6 at 53.5% conversion).

**2-Isopropyloct-1-en-3-ol (entry 3).** The general procedure was followed, using 6.6 mg (0.010 mmol) of (+)-**1**, 71.1 mg (0.500 mmol) of alcohol, 31.3 L (0.225 mmol) of NEt3, and 42.5 L (0.450 mmol) of Ac2O. After 7 days, additional NEt3 (31.3 L, 0.225 mmol) was added. Total reaction time: 28 days. GC analysis of the alcohol revealed an 88.8% ee. The acetate was reduced with LiAlH4, and then analyzed by GC, which showed a 29.6% ee of alcohol. These ee values correspond to a selectivity factor (s) of 4.7 at 75.0% conversion.

A second run provided a 27.4% ee of acetate and an 89.9% ee of alcohol (s = 4.6 at 76.6% conversion).

**2-Isopropyl-4-methylpent-1-en-3-ol (entry 4).** The general procedure was followed, using 6.6 mg (0.010 mmol) of (+)-**1**, 71.1 mg (0.500 mmol) of alcohol, 27.8 L (0.200 mmol) of NEt3, and 70.9 L (0.75 mmol) of Ac2O. After 8.5 days, additional NEt3 (27.8 L, 0.200 mmol) was added. Total reaction time: 14.5 days. GC analysis revealed an 89.8% ee of alcohol and a 55.2% ee of acetate. These ee values correspond to a selectivity factor (s) of 10.0 at 61.9% conversion.

A second run provided a 53.1% ee of acetate and a 92.5% ee of alcohol (s = 10.2 at 63.5% conversion).

**2-Methylpent-1-en-3-ol (entry 5).** The general procedure was followed, using 6.6 mg (0.010 mmol) of (+)-**1**, 50.1 mg (0.500 mmol) of alcohol, 52.2 L (0.375 mmol) of NEt3, and 35.4 L (0.375 mmol) of Ac2O. Reaction time: 13.5 days. GC analysis of the acetate revealed a 53.9% ee. The alcohol was converted into the acetate (DMAP, Ac2O, NEt3) and analyzed by GC, which showed a 92.7% ee of acetate. These ee values correspond to a selectivity factor (s) of 10.5 at 63.2% conversion.

A second run provided a 56.4% ee of acetate and a 90.2% ee of alcohol (s = 10.5 at 61.5% conversion).

**2,4-Dimethylpent-1-en-3-ol (entry 6).** The general procedure was followed, using 6.6 mg (0.010 mmol) of (+)-**1**, 57.1 mg (0.500 mmol) of alcohol, 52.2 L (0.375 mmol) of NEt3, and 35.4 L (0.375 mmol) of Ac2O. Reaction time: 7 days. GC analysis of the acetate revealed a 67.6% ee. The alcohol was converted into the acetate (DMAP, Ac2O, NEt3) and analyzed by GC, which revealed a 93.0% ee of acetate. These ee values correspond to a selectivity factor (s) of 17.2 at 58.0% conversion.

A second run provided a 69.8% ee of acetate and a 90.8% ee of alcohol (s = 17.2 at 56.5% conversion).

**2-*n*-Butyl-4-methylpent-1-en-3-ol (entry 7).** The general procedure was followed, using 3.3 mg (0.0050 mmol) of (+)-**1**, 78.1 mg (0.500 mmol) of alcohol, 52.2 L (0.375 mmol) of NEt3, and 35.4 L (0.375 mmol) of Ac2O. Reaction time: 12 days. GC analysis revealed a 75.2% ee of acetate and a 95.1% ee of alcohol. These ee values correspond to a selectivity factor (s) of 25.7 at 55.8% conversion.

A second run using (+)-**1** (8.25 mg, 0.0125 mmol) provided a 76.1% ee of acetate and a 93.5% ee of alcohol (s = 25.0 at 55.1% conversion; reaction time: 4 days).

**2-Phenyl-4-methylpent-1-en-3-ol (entry 8).** The general procedure was followed, using 6.6 mg (0.010 mmol) of (+)-**1**, 88.1 mg (0.500 mmol) of alcohol, 52.2 L (0.375 mmol) of NEt3, and 35.4 L (0.375 mmol) of Ac2O. Reaction time: 7 days. GC analysis revealed a 63.3% ee of acetate and a 93.1% ee of alcohol. These ee values correspond to a selectivity factor (s) of 14.5 at 59.5% conversion.

A second run provided a 63.3% ee of acetate and a 92.8% ee of alcohol (s = 14.4 at 59.4% conversion).

**(*E*)-3-Methyl-4-phenylbut-3-en-2-ol (entry 9).** The general procedure was followed, using 3.3 mg (0.0050 mmol) of (+)-**1**, 81.0 mg (0.500 mmol) of alcohol, 52.2 L (0.375 mmol) of NEt3, and 35.4 L (0.375 mmol) of Ac2O. Reaction time: 15.0 hours. GC analysis revealed an 88.8% ee of acetate. The alcohol was converted into the acetate (DMAP, Ac2O, NEt3) and analyzed by GC, which showed a 98.4% ee. These ee values correspond to a selectivity factor (s) of 80.8 at 52.6% conversion.

A second run provided a 91.0% ee of acetate and a 95.0% ee of alcohol (s = 78.8 at 51.1% conversion).

**(*Z*)-2-Methylnon-4-en-3-ol (entry 10).** The general procedure was followed, using 6.6 mg (0.010 mmol) of (+)-**1**, 78.1 mg (0.500 mmol) of alcohol, 31.3 L (0.225 mmol) of NEt3, and 42.5 L (0.450 mmol) of Ac2O. After 7 days, additional NEt3 (31.3 L, 0.225 mmol) was added. Total reaction time: 21 days. GC analysis revealed a 33.6% ee of acetate and a 90.0% ee of alcohol. These ee values correspond to a selectivity factor (s) of 5.5 at 72.8% conversion.

A second run provided a 31.8% ee of acetate and a 90.2% ee of alcohol (s = 5.2 at 74.0% conversion).

**2-Methylnon-2-en-3-ol (entry 11).** The general procedure was followed, using 8.2 mg (0.012 mmol) of (+)-**1**, 79.0 mg (0.505 mmol) of alcohol, 52.2 L (0.375 mmol) of NEt3, and 35.4 L (0.375 mmol) of Ac2O. Reaction time: 7 days. GC analysis revealed a 49.5% ee of acetate and a 97.0% ee of alcohol. These ee values correspond to a selectivity factor (s) of 11.6 at 66.3% conversion.

A second run using (+)-**1** (3.3 mg, 0.0050 mmol) provided a 60.2% ee of acetate and a 91.6% ee of alcohol (s = 12.4 at 60.3% conversion).

**2,5-Dimethylhex-4-en-3-ol (entry 12).** The general procedure was followed, using 6.6 mg (0.010 mmol) of (+)-**1**, 64.1 mg (0.500 mmol) of alcohol, 52.2 L (0.375 mmol) of NEt3, and 35.4 L (0.375 mmol) of Ac2O. Reaction time: 7 days. GC analysis revealed a 64.2% ee of acetate and a 96.9% ee of alcohol. These ee values correspond to a selectivity factor (s) of 18.1 at 60.2% conversion.

A second run provided a 66.2% ee of acetate and a 95.2% ee of alcohol (s = 17.6 at 59.0% conversion).

**2,4,5-Trimethylhex-4-en-3-ol (entry 13).** The general procedure was followed, using 3.3 mg (0.0050 mmol) of (+)-**1**, 72.3 mg (0.508 mmol) of alcohol, 52.2 L (0.375 mmol) of NEt3, and 35.4 L (0.375 mmol) of Ac2O. Reaction time: 7 days. GC analysis of the acetate revealed a 68.1% ee. The alcohol was converted into the acetate (DMAP, Ac2O, and NEt3) and analyzed by GC, which showed a 99.4% ee of acetate. These ee values correspond to a selectivity factor (s) of 28.8 at 59.3% conversion.

A second run provided a 75.3% ee of acetate and a 97.3% ee of alcohol (s = 29.6 at 56.4% conversion).

III. Kinetic Resolution in the Presence of Air with Unpurified Reagents

A vial containing catalyst (+)-**1** (6.6 mg, 0.010 mmol) and 2,5-dimethylhex-4-en-3-ol (64.0 mg, 0.499 mmol) was removed from the glove box and opened to air. *t*-Amyl alcohol (1.0 mL; Alfa-Aesar, 98%) and NEt3 (52.2 L, 0.375 mmol; EM Science, 98%) were added by syringe. The vial was capped with a septum and sonicated to help dissolve the catalyst. After the catalyst had completely dissolved, the vial was cooled in an ice bath, and Ac2O (35.4 L, 0.375 mmol; Mallinckrodt, 99.8%) was added by syringe. After 7 days, GC analysis revealed a 63.6% ee of acetate and a 96.5% ee of alcohol. These ee values correspond to a selectivity factor (s) of 17.3 at 60.3% conversion.

IV. Preparative-Scale Resolution of a Baclofen Intermediate (eq 2)

In the air, *t*-amyl alcohol (22.0 mL; distilled from CaH2) and NEt3 (0.99 mL, 7.1 mmol; EM Science, 98%) were added to a vial containing (*E*)-4-(4-chlorophenyl)but-3-en-2-ol (2.01 g, 11.0 mmol) and (-)-**1** (73.0 mg, 0.111 mmol). The vial was closed with a teflon-lined cap and sonicated to help dissolve the catalyst. The reaction mixture was cooled in an ice bath, and Ac2O (0.67 mL, 7.1 mmol; Mallinckrodt 99.8%) was added. After 47 hours, the reaction was quenched with MeOH (0.5 mL). The mixture was passed through a silica gel column (20%  100% EtOAc/hexanes, then 50% NEt3/EtOAc) to separate the alcohol and the acetate from the catalyst (70.0 mg (96%) of pure catalyst was recovered). The alcohol and the acetate were then separated by flash chromatography (15%  50% Et2O/hexanes), which afforded 1.42 g (57%) of acetate (HPLC analysis  74.0% ee) and 0.81 g (40%) of alcohol. A small amount of the alcohol was converted to the acetate (DMAP, Ac2O, NEt3) and analyzed by HPLC, which showed a 99.4% ee. These ee values correspond to a selectivity factor (s) of 37.2 at 57.3% conversion.

V. Preparative-Scale Resolution of an Epothilone Intermediate (eq 3)

In the air, *t*-amyl alcohol (8.75 mL; distilled from CaH2) and NEt3 (0.36 mL, 2.6 mmol; EM Science, 98%) were added to a vial containing the alcohol (1.16 g, 4.42 mmol) and (+)-**1** (29.0 mg, 0.0439 mmol). The vial was closed with a teflon-lined cap and sonicated to help dissolve the catalyst. The reaction mixture was cooled in an ice bath, and Ac2O (0.25 mL, 2.6 mmol; Mallinckrodt, 99.8%) was added. After 42.5 hours, the reaction was quenched with MeOH (0.25 mL). The mixture was passed through a silica gel column (20%  100% EtOAc/hexanes, then 50% NEt3/EtOAc) to separate the alcohol and the acetate from the catalyst (27.6 mg (95%) of pure catalyst was recovered). The alcohol and the acetate were then separated by flash chromatography (10%  25% EtOAc/hexanes), which afforded 0.70 g (52%) of acetate (HPLC analysis  91.8% ee) and 0.55 g (47%) of alcohol (HPLC analysis  98.0% ee). These ee values correspond to a selectivity factor (s) of 107 at 51.6% conversion.

VI. Assignment of Absolute Stereochemistry

For allylic alcohols that are not listed below, the assignment of absolute configuration in Table 1 is based on analogy.

**Entry 1.** The sign of the optical rotation of the 3-methylbutane-1,2-diol that is obtained from the acetate produced by catalyst (-)-**1** is negative ( R[[2]](#footnote-3)). Therefore, the absolute configuration of the resolved alcohol that is produced by catalyst (+)-**1** is R.

**Entry 2.** The sign of the optical rotation of the kinetically resolved alcohol that is produced by catalyst (+)-**1** is negative; therefore, its absolute configuration is R.[[3]](#footnote-4)

**Entry 5.** The sign of the optical rotation of the product of ozonolysis of the acetate produced by catalyst (-)-**1** is positive ( R[[4]](#footnote-5)). Therefore, the absolute configuration of the kinetically resolved alcohol provided by catalyst (+)-**1** is R.

**Entry 8.** The sign of the optical rotation of the 1-phenyl-2-acetoxy-3-methyl-1-butanone that is obtained from ozonolysis of the acetate produced by catalyst (-)-**1** is negative ( R[[5]](#footnote-6)). Therefore, the absolute configuration of the kinetically resolved alcohol that is provided by catalyst (+)-**1** is R.

**Entry 9.** The absolute configuration was determined by converting the alcohol that was resolved by catalyst (+)-**1** into the Mosher's ester. The absolute configuration of the alcohol is R.[[6]](#footnote-7)

**Entry 10.** The sign of the optical rotation of the 3-methylbutane-1,2-diol that is obtained from the acetate produced by catalyst (-)-**1** is negative ( R[[7]](#footnote-8)). Therefore, the absolute configuration of the resolved alcohol that is produced by catalyst (+)-**1** is R.

**Entry 11.** The sign of the optical rotation of the heptane-1,2-diol that is obtained from the acetate produced by catalyst (+)-**1** is negative ( S[[8]](#footnote-9)). Therefore, the absolute configuration of the resolved alcohol that is produced by catalyst (+)-**1** is R.

**Entry 12.** The sign of the optical rotation of the 3-methylbutane-1,2-diol that is obtained from the acetate produced by catalyst (-)-**1** is negative ( R[[9]](#footnote-10)). Therefore, the absolute configuration of the resolved alcohol that is produced by catalyst (+)-**1** is R.

**Eq 2.** The sign of the optical rotation of the resolved alcohol produced by catalyst (-)-**1** is negative; therefore, its absolute configuration is S.[[10]](#footnote-11)

**Eq 3.** The sign of the optical rotation of the resolved alcohol produced by catalyst (+)-**1** is positive; therefore, its absolute configuration is R,R.[[11]](#footnote-12)

VII. Methods Used to Assay Enantiomeric Excess

| Substrate | ee Assay | Conditions | Retention times  (min) | |
| --- | --- | --- | --- | --- |
|  | GC  Chiraldex  B-PH | 40 °C, 20 min;  0.5 °C/min to 80 °C;  1.4 mL/min  carrier gas flow | 27.0 | 29.5 |
|  | GC  Chiraldex  B-PH | 115 °C;  2.0 mL/min  carrier gas flow | 18.6 | 19.6 |
|  | GC  Chiraldex  B-PH | 40 °C, 20 min;  0.5 °C/min to 80 °C;  1.4 mL/min  carrier gas flow | 78.4 | 79.5 |
|  | GC  Chiraldex  G-TA | 40 °C, 20 min;  1.0 °C/min to  70 °C;  0.9 mL/min  carrier gas flow | 34.9 | 36.9 |
|  | GC  Chiraldex  G-TA | 40 °C;  0.9 mL/min  carrier gas flow | 51.2 | 56.3 |
|  | GC  Chiraldex  G-TA | 40 °C;  1.0 °C/min to 80 °C;  1.5 mL/min  carrier gas flow | 11.7 | 14.9 |
|  | GC  Chiraldex  G-TA | 40 °C;  1.0 °C/min to 80 °C;  1.5 mL/min  carrier gas flow | 13.9 | 18.9 |
|  | GC  Chiraldex  B-PH | 40 °C, 18 min;  2.0 °C/min to 70 °C;  1.4 mL/min  carrier gas flow | 47.2 | 48.3 |
|  | GC  Chiraldex  B-PH | 40 °C, 18 min;  2.0 °C/min to 70˚C;  1.4 mL/min  carrier gas flow | 33.3 | 34.4 |
|  | GC  Chiraldex  G-TA | 100 °C;  1.5 mL/min  carrier gas flow | 19.6 | 21.5 |
|  | GC  Chiraldex  G-TA | 100 °C;  1.5 mL/min  carrier gas flow | 19.5 | 20.4 |
|  | GC  Chiraldex  B-PH | 115 °C;  2.0 mL/min  carrier gas flow | 17.7 | 18.6 |
|  | GC  Chiraldex  G-TA | 40 °C, 20 min; 1.0 °C/min to  70 °C;  0.9 mL/min  carrier gas flow | 51.6 | 53.0 |
|  | GC  Chiraldex  G-TA | 40 °C;  1.0 °C/min to 80 °C;  1.5 mL/min  carrier gas flow | 35.5 | 37.7 |
|  | GC  Chiraldex  B-PH | 40 °C, 18 min;  2.0 °C/min to 70 °C;  1.4 mL/min  carrier gas flow | 22.0 | 24.9 |
|  | GC  Chiraldex  B-PH | 40 °C, 18 min;  2.0 °C/min to 70 °C;  1.4 mL/min  carrier gas flow | 10.6 | 11.4 |
|  | GC  Chiraldex  B-PH | 40 °C, 20 min;  0.5 °C/min to 80 °C;  1.4 mL/min  carrier gas flow | 22.4 | 27.5 |
|  | GC  Chiraldex  B-PH | 40 °C, 20 min;  0.5 °C/min to 80 °C;  1.4 mL/min  carrier gas flow | 10.3 | 11.2 |
|  | GC  Chiraldex  G-TA | 40 °C;  1.0 °C/min to 80 °C;  1.5 mL/min  carrier gas flow | 24.9 | 27.6 |
|  | HPLC  Chiralcel OD | 99/1 hexanes/iso-propanol  1 mL/min | 6.0 | 6.5 |
|  | HPLC  Chiralcel OD | 90/10 hexanes/iso-propanol  1 mL/min | 8.2 | 10.5 |
|  | HPLC  Regis *R,R*-WHELK-O | 80/20 hexanes/iso-propanol  1 mL/min | 19.9 | 33.0 |

1. (?) Ruble, J. C.; Latham, H. A.; Fu, G. C. *J. Am. Chem. Soc.* **1997**, *119*, 1492-1493. [↑](#footnote-ref-2)
2. (?) Guette, J.-P.; Spassky, N. *Bull. Chem. Soc. Fr.* **1972**, 4217-4224. [↑](#footnote-ref-3)
3. (?) Schenck, T. G.; Bosnich, B. *J. Am. Chem. Soc.* **1985**, *107*, 2058-2066. [↑](#footnote-ref-4)
4. (?) Matsuo, N.; Yano, T.; Yoshioka H. *Agric. Biol. Chem.* **1981**, 1915-1916. [↑](#footnote-ref-5)
5. (?) Ohta, H.; Ikemoto, M.; Ii, H.; Okamoto, Y.; Tsuchihashi, G. *Chem. Lett.* **1986**, 1169-1172. [↑](#footnote-ref-6)
6. (?) Fuganti, C.; Grasselli, P.; Spreafico, F.; Zirotti, C.; Casati, P. *J. Chem. Res., Synop.* **1985**, 22-23. [↑](#footnote-ref-7)
7. (?) Guette, J.-P.; Spassky, N. *Bull. Chem. Soc. Fr.* **1972**, 4217-4224. [↑](#footnote-ref-8)
8. (?) Tokles, M.; Snyder, J. K. *Tetrahedron Lett.* **1986**, *27*, 3951-3954. [↑](#footnote-ref-9)
9. (?) Guette, J.-P.; Spassky, N. *Bull. Chem. Soc. Fr.* **1972**, 4217-4224. [↑](#footnote-ref-10)
10. (?) Brenna, E.; Caraccia, N.; Fuganti, C.; Fuganti, D.; Grasselli, P. *Tetrahedron: Asymmetry* **1997**, *8*, 3801-3805. [↑](#footnote-ref-11)
11. (?) Sinha, S. C.; Barbas, C. F., III; Lerner, R. A. *Proc. Natl. Acad. Sci. USA* **1998**, *95*, 14603-14608. [↑](#footnote-ref-12)
